# Supplementary material for: Synthesis and properties of a series of iridium complexes with imidazolo[2,1-b]thiazole derivatives as primary ligands
Source: Royal Society of Chemistry journal article supplement (doi:10.1039/c8nj06295a), 2019-01-01

## New Journal of Chemistry

### Synthesis and properties of a series of iridium complexes with imidazolo[2,1-b]thiazole derivatives as primary ligands

Xin-ying Yin,<sup>a</sup> Zhi-yu Yang,<sup>b</sup> Guo-li Huang,<sup>a</sup> Jian-jian Bian,<sup>a</sup> Deng-qiang Wang,<sup>a</sup> Qin  
Wang,<sup>a</sup> Ming-yu Teng,<sup>\*a</sup> Zheng-liang Wang,<sup>\*b</sup> Jie Zhang,<sup>\*c</sup>

<sup>a</sup>*Faculty of Chemistry and Chemical Engineering, Yunnan Normal University,  
Kunming 650500, China. (phone: +86 871 65941087; fax: +86 871 65941087;*

*E-mail: [myteng@ynnu.edu.cn](mailto:myteng@ynnu.edu.cn))*

<sup>b</sup>*School of Chemistry & Environment, Yunnan Minzu University, Kunming,  
Yunnan 650504, China. (phone: +86 871 65910017; fax: +86 871 65910017; E-*

*mail: [wangzhengliang@foxmail.com](mailto:wangzhengliang@foxmail.com))*

<sup>c</sup>*School of Pharmaceutical and Chemical Engineering, Taizhou University,  
Taizhou 318000, Zhejiang Province, China. (phone: +86 576 88660177; fax: +86*

*576 88660177; E-mail: [zhang\\_jie@tzc.edu.cn](mailto:zhang_jie@tzc.edu.cn))*

### Electronic Supporting Information

- |                                                                   |     |
|-------------------------------------------------------------------|-----|
| 1. <sup>1</sup> H NMR spectra for the title compounds and mtfpmt  | S2  |
| 2. <sup>13</sup> C NMR spectra for the title compounds and mtfpmt | S8  |
| 3. IR spectra for the title compounds and mtfpmt                  | S14 |
| 4. ESI- MS spectra for title compounds and nmtfpmt                | S20 |
| 5. CV spectra for the title compounds                             | S23 |

## $^1\text{H}$ NMR spectra for the title compounds and mtfpmt:

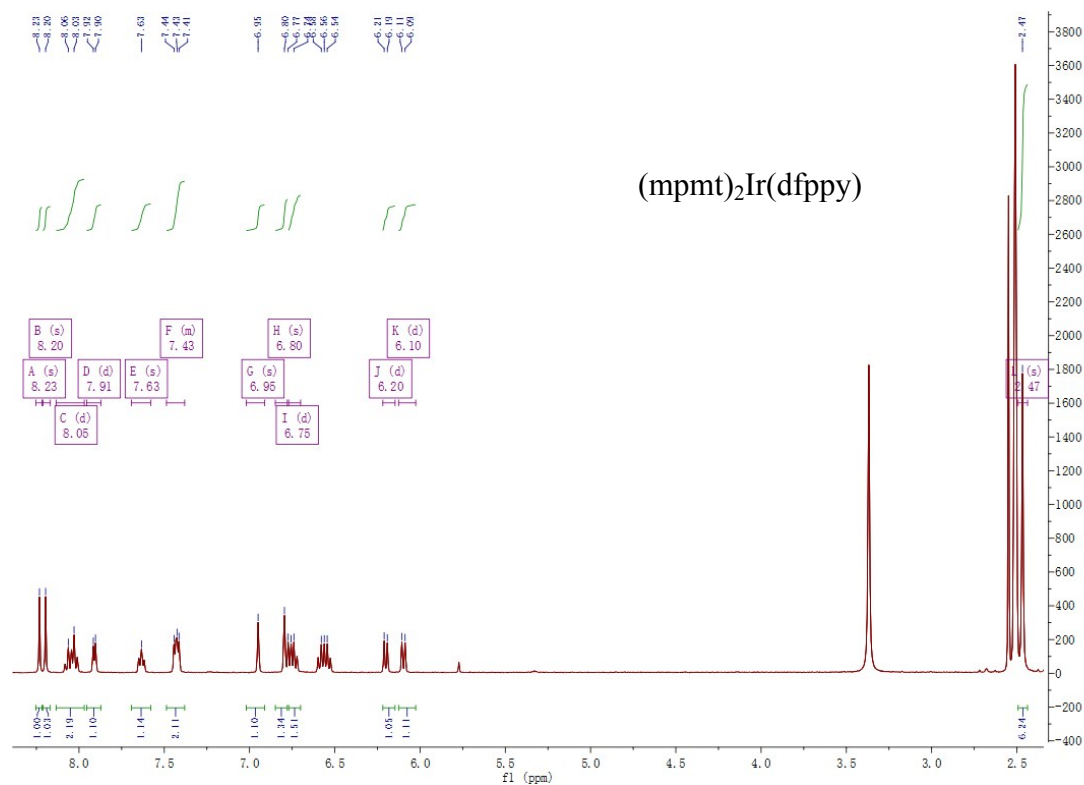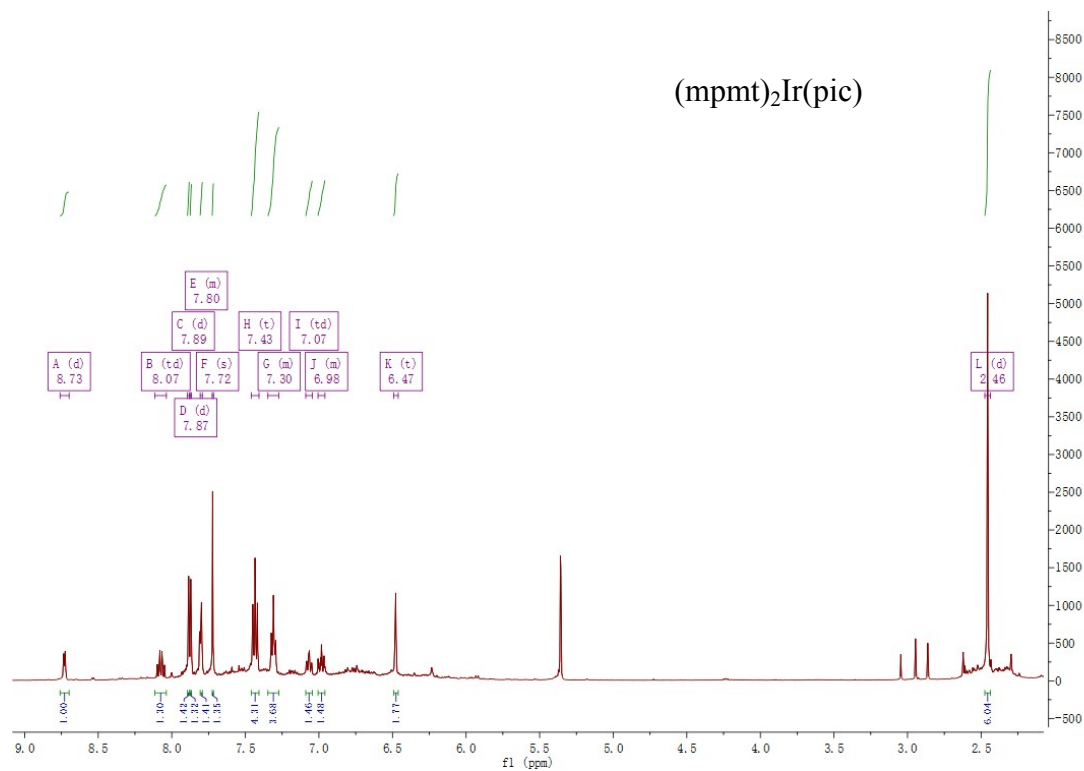

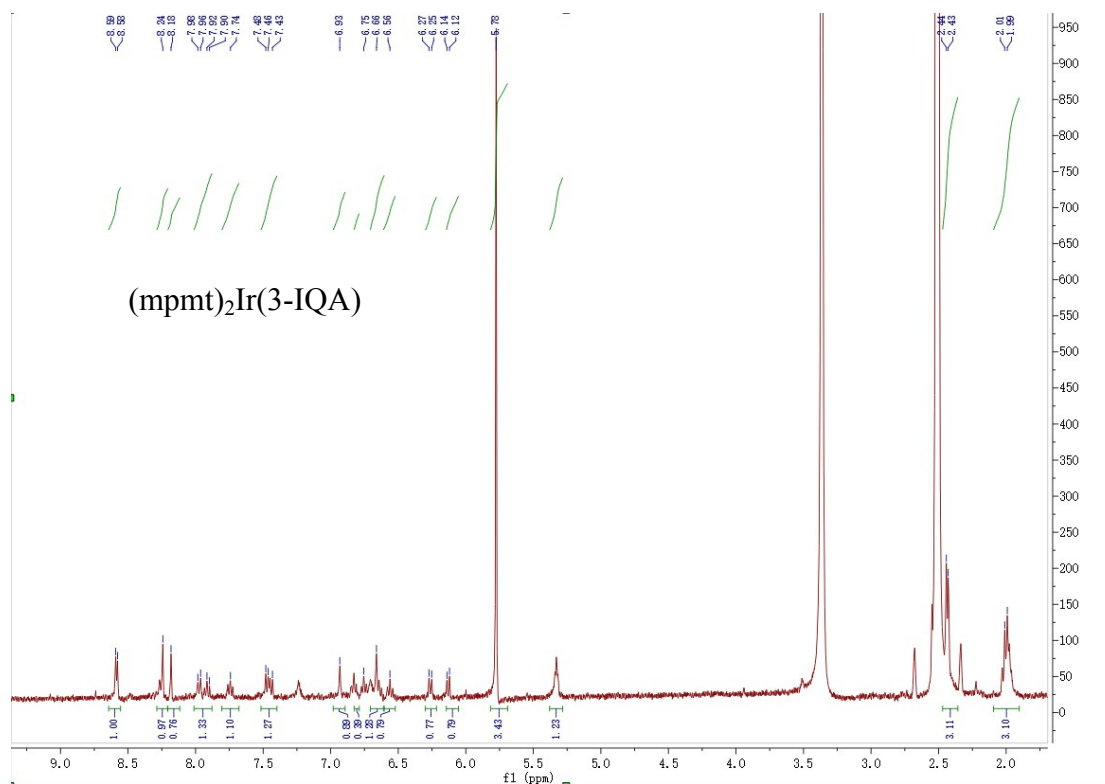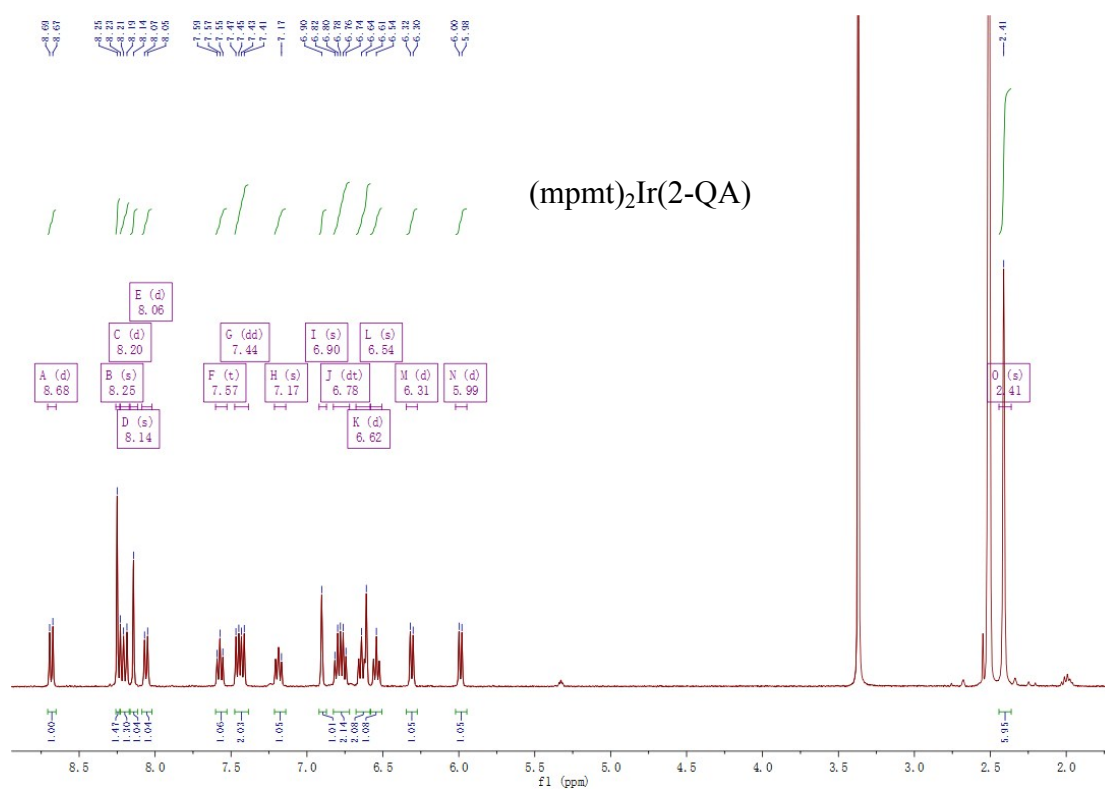

YXY018

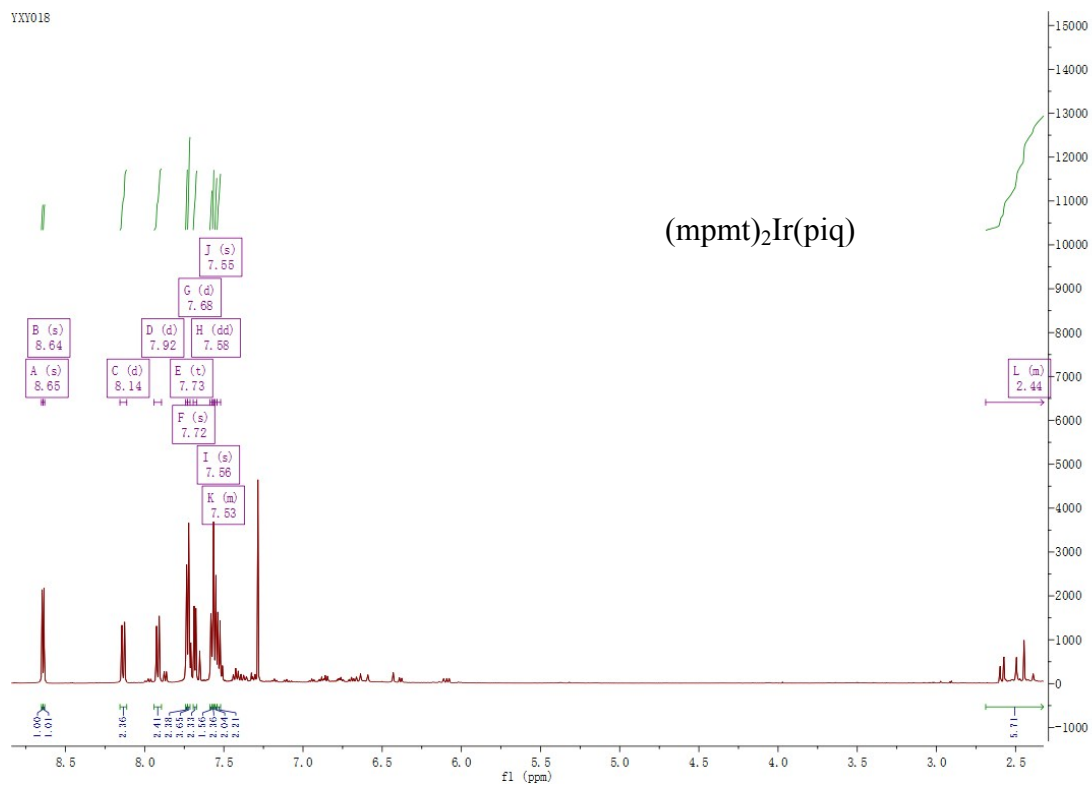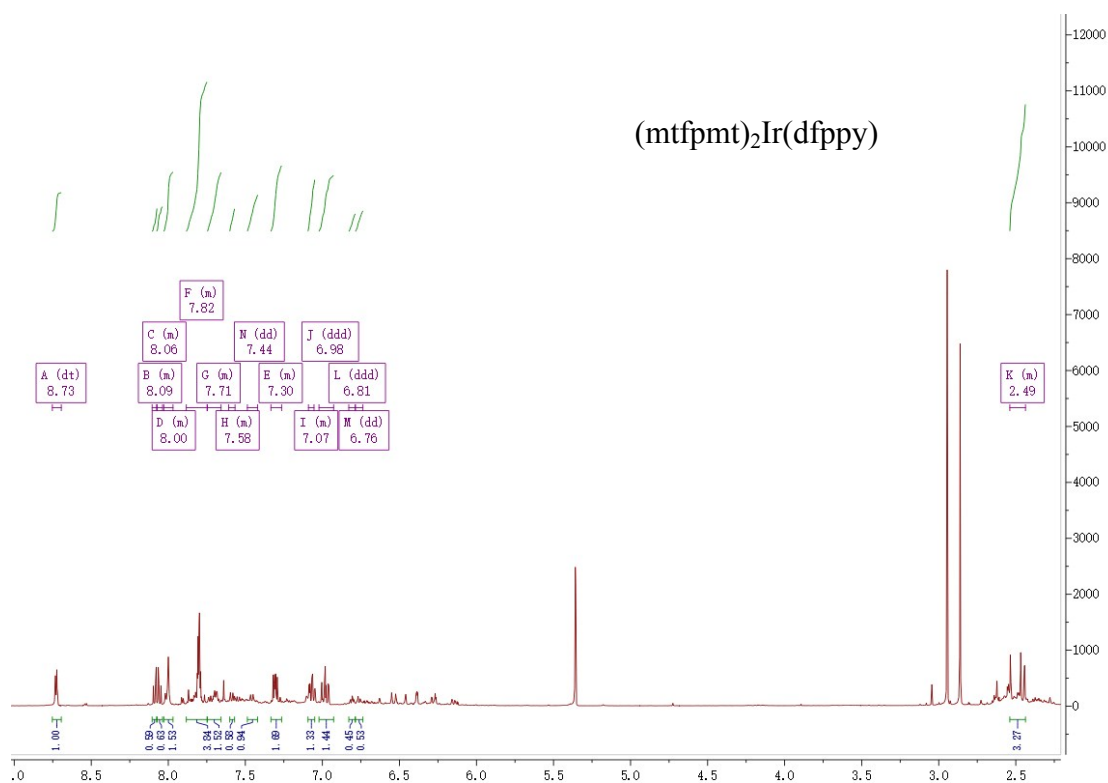

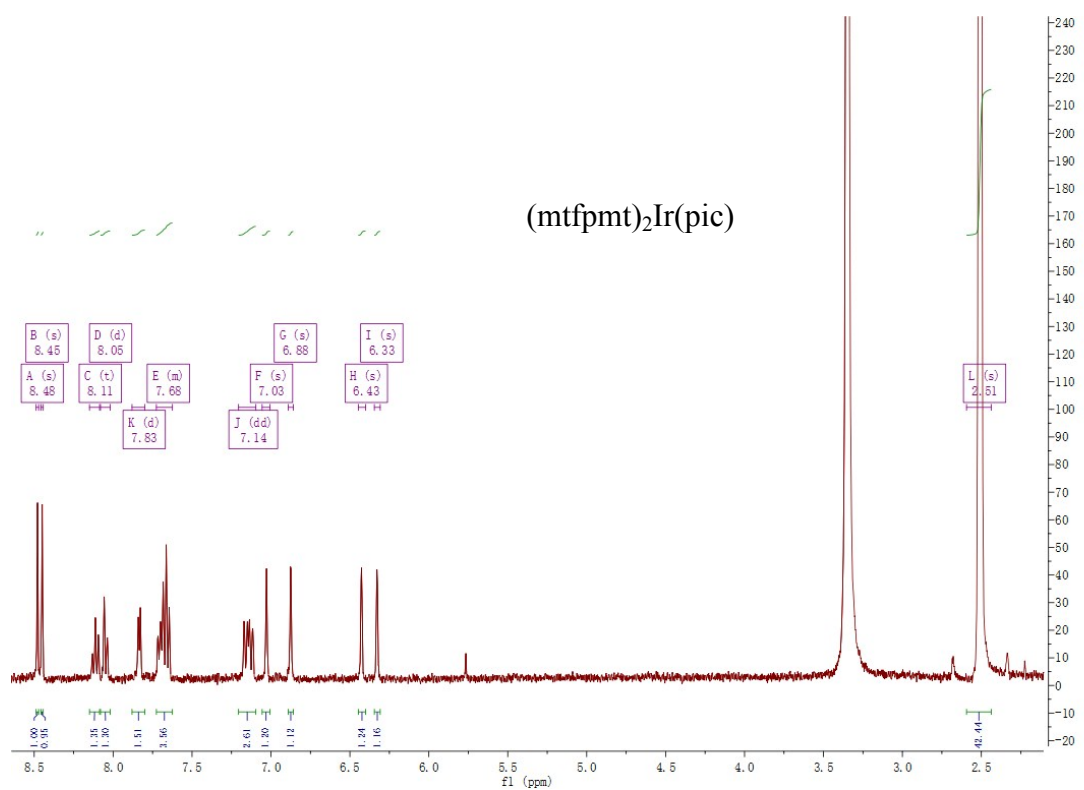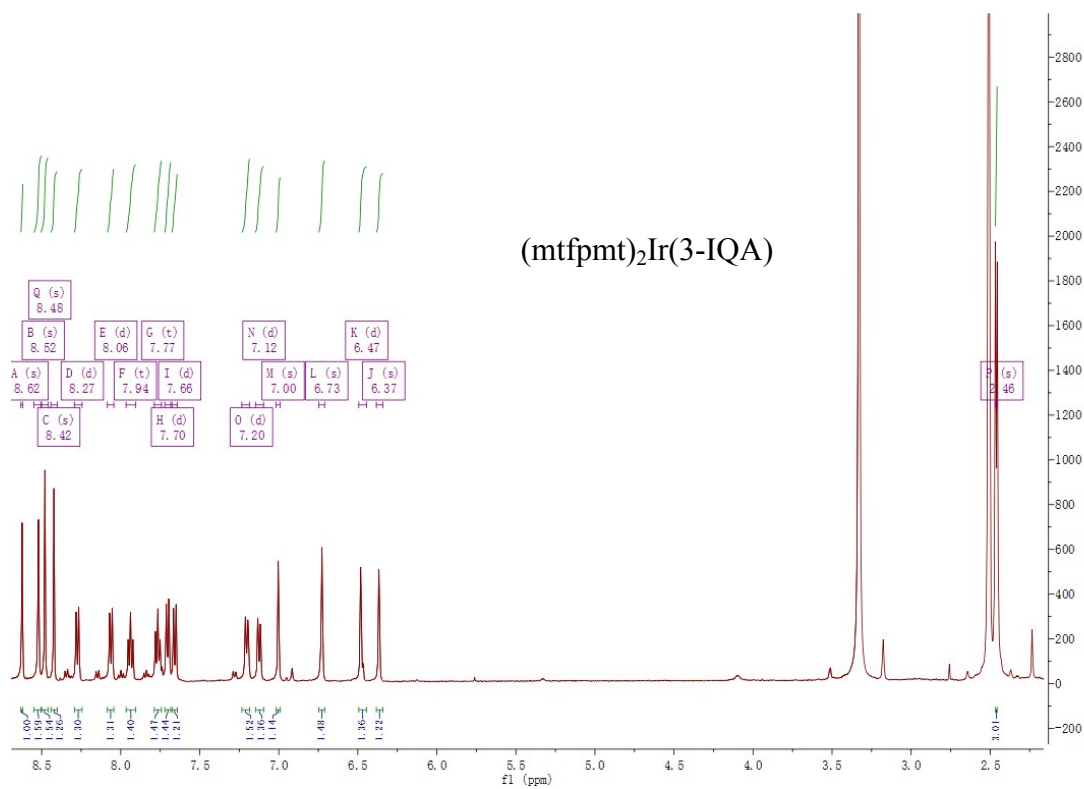

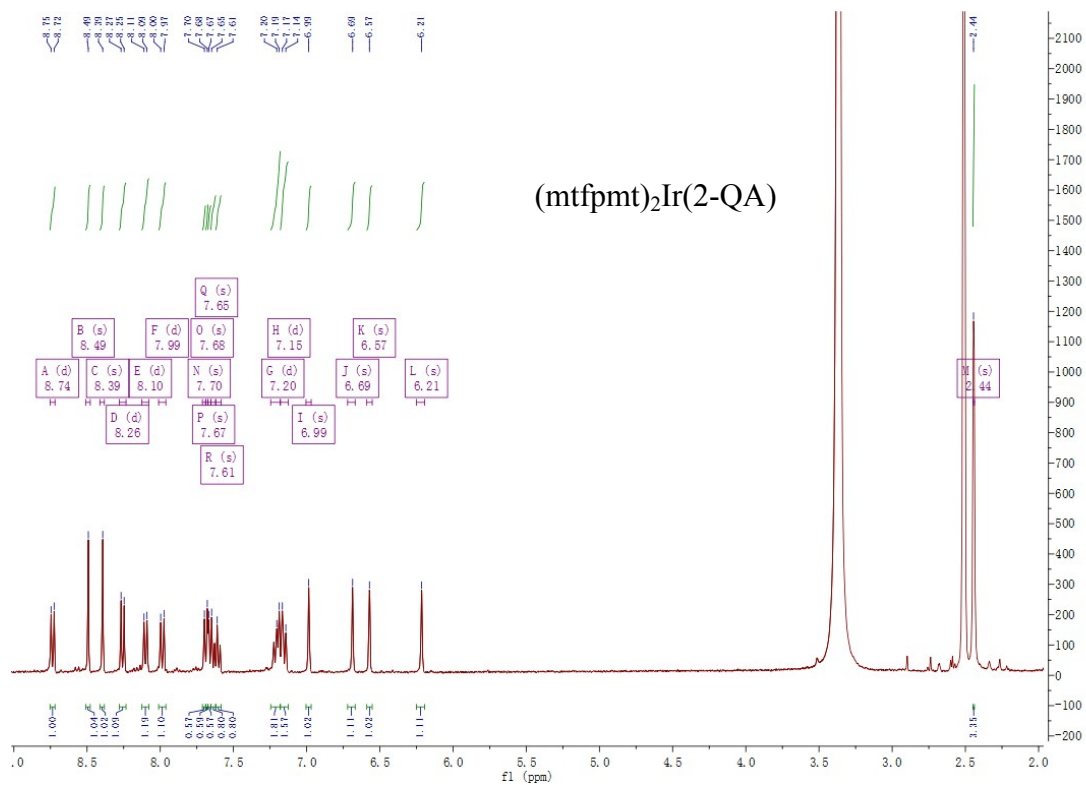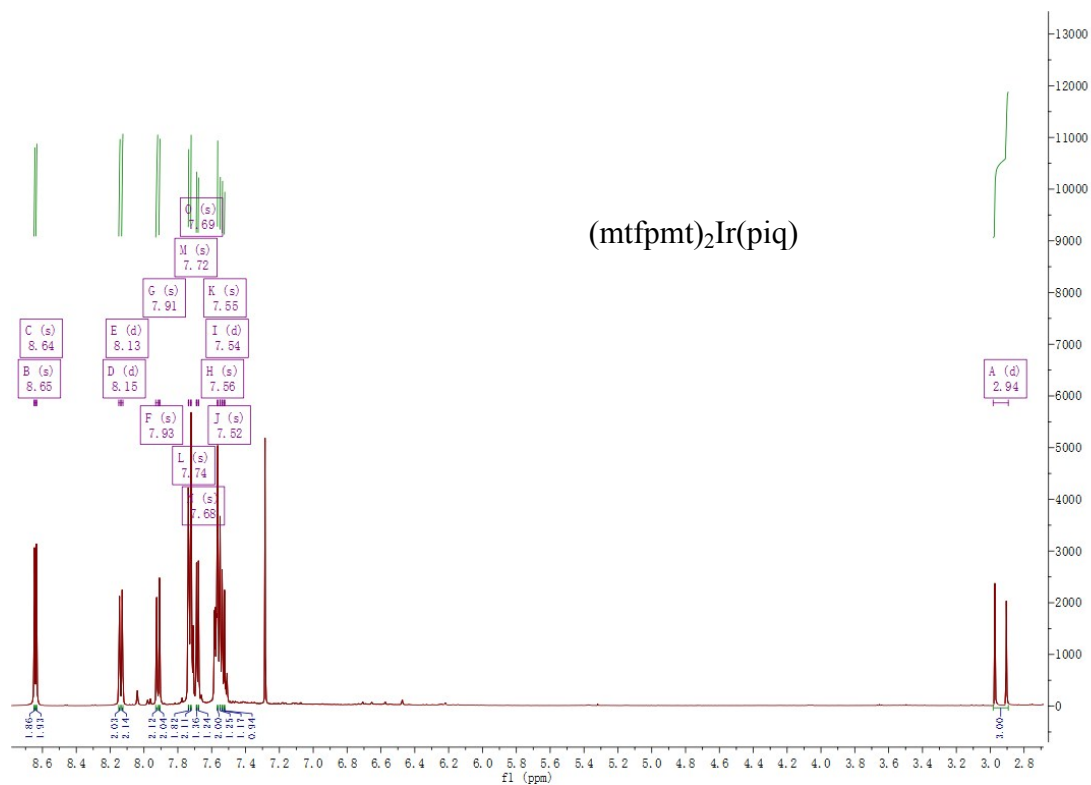

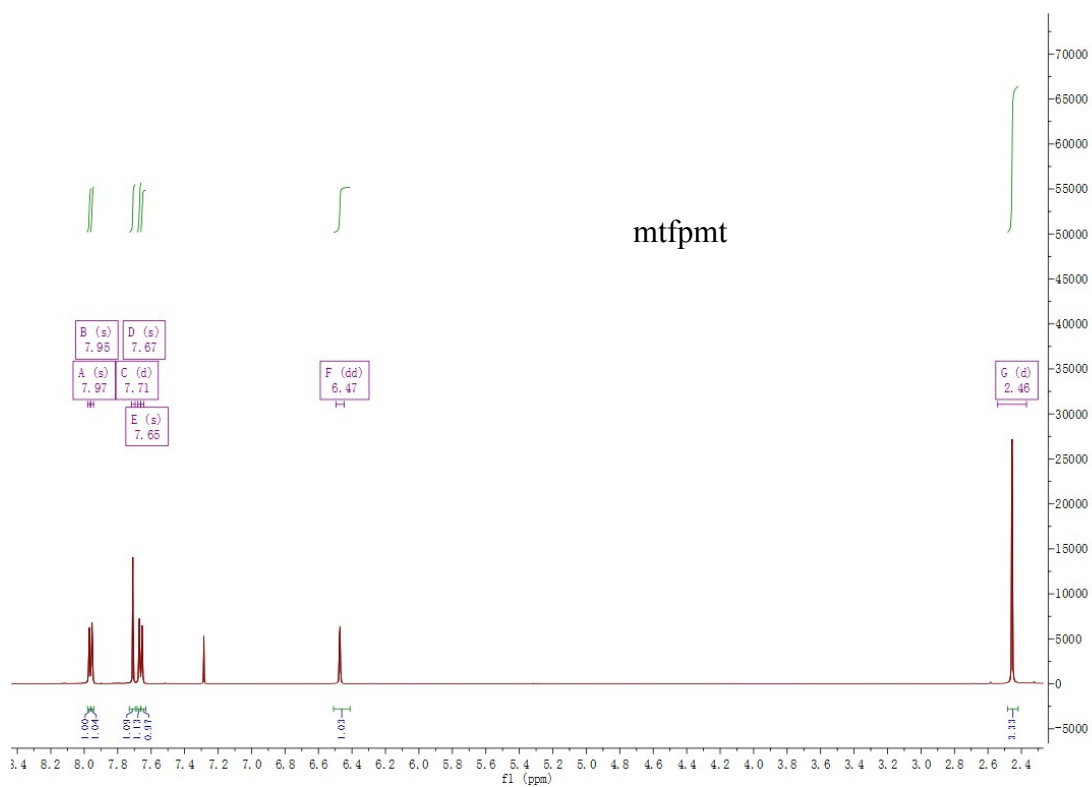

## $^{13}\text{C}$ NMR spectra for the compounds and mtfpmt:

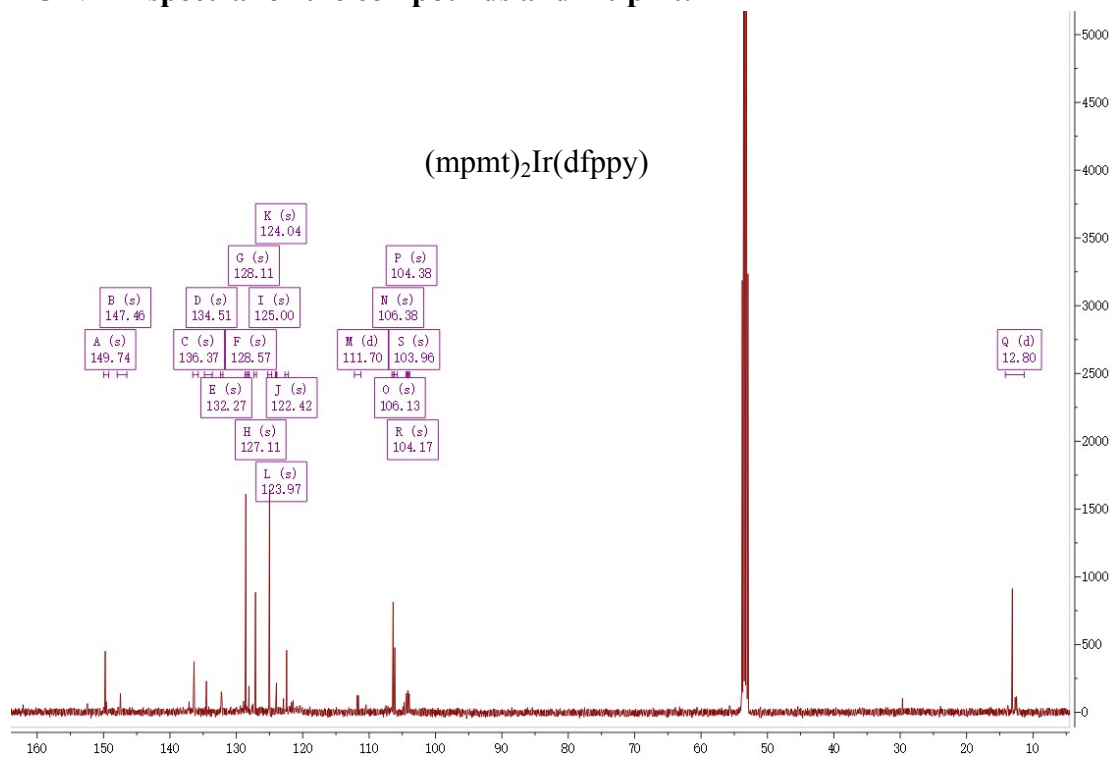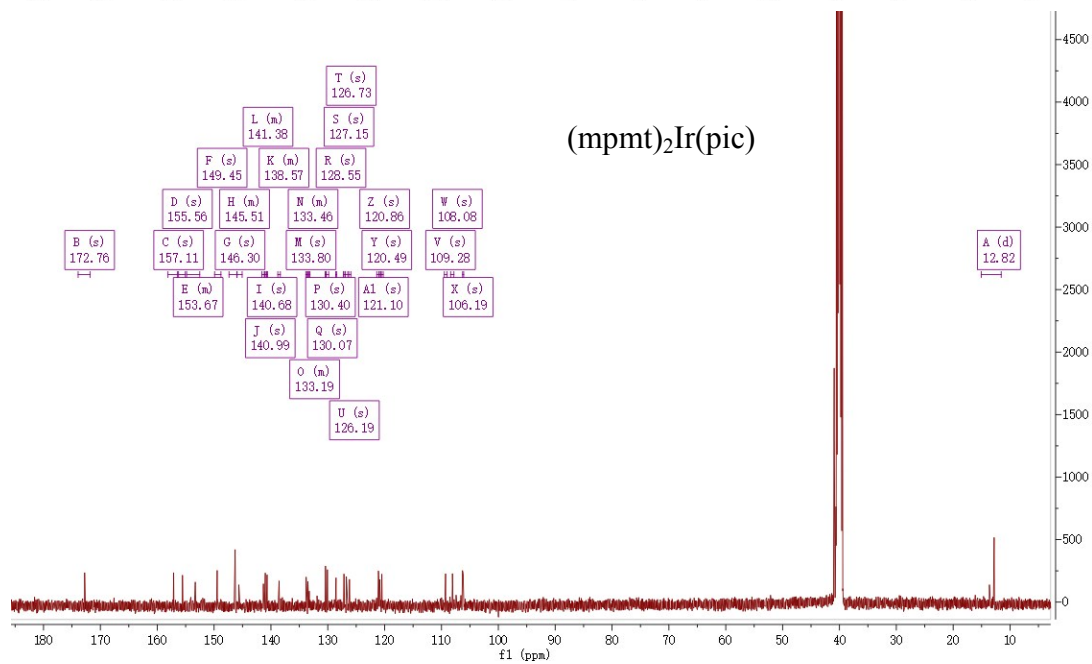





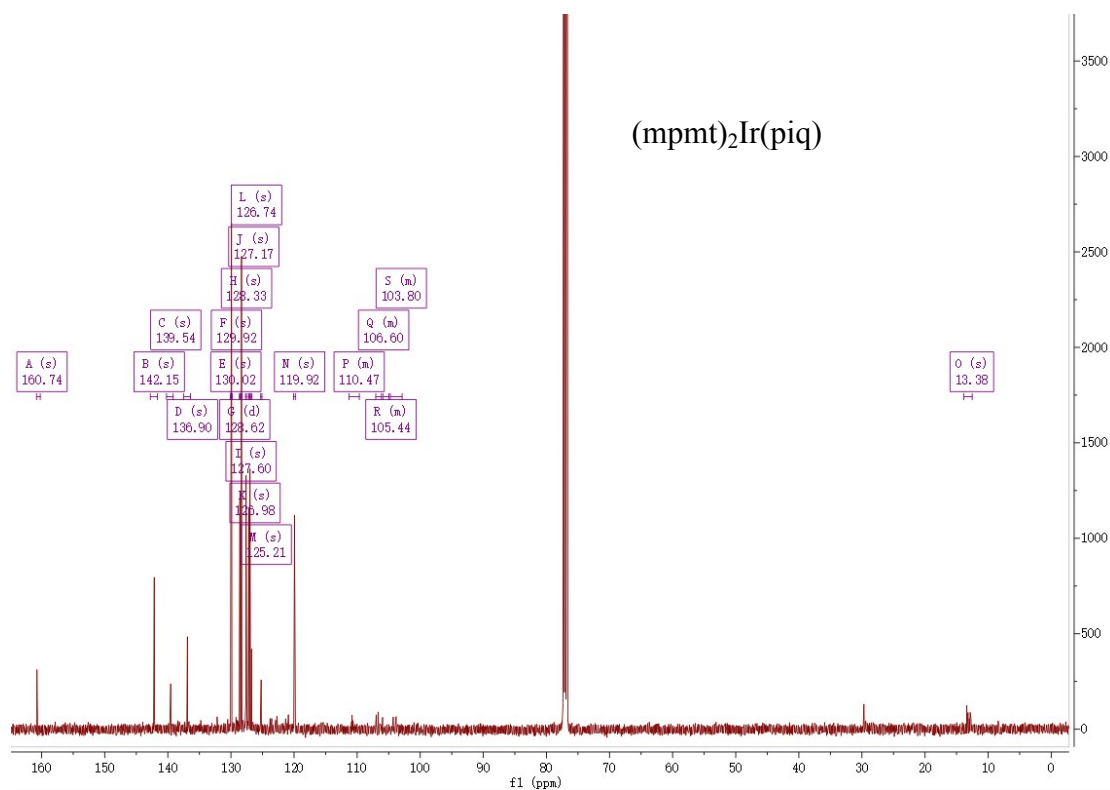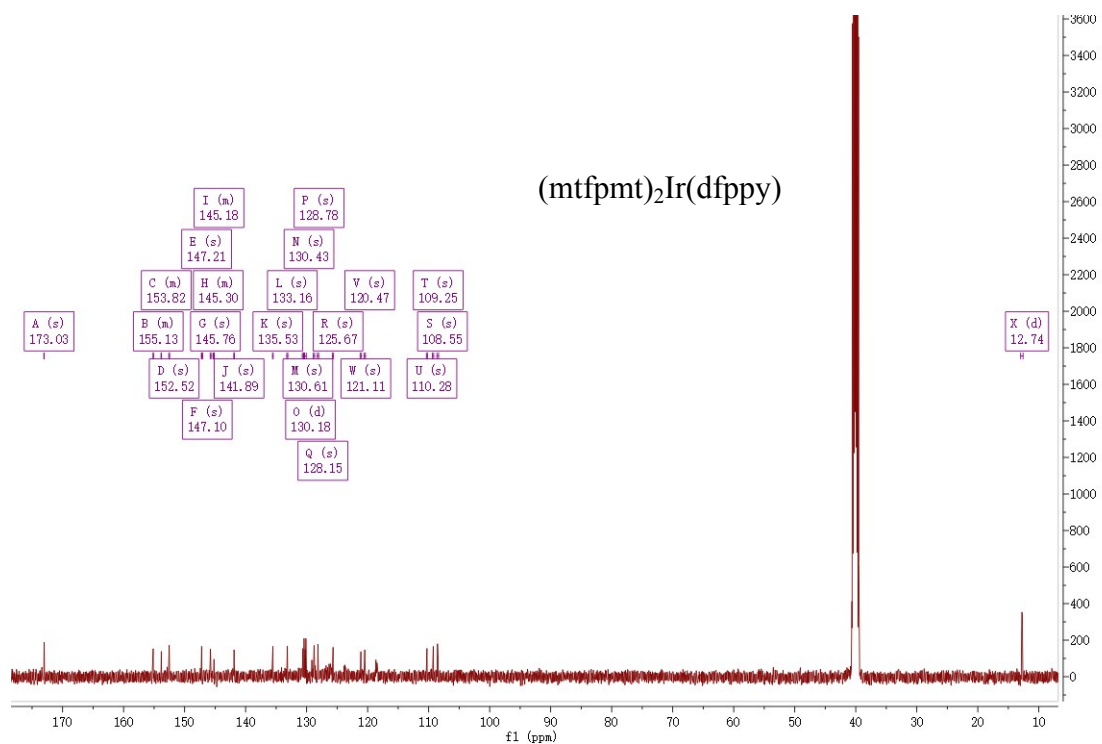

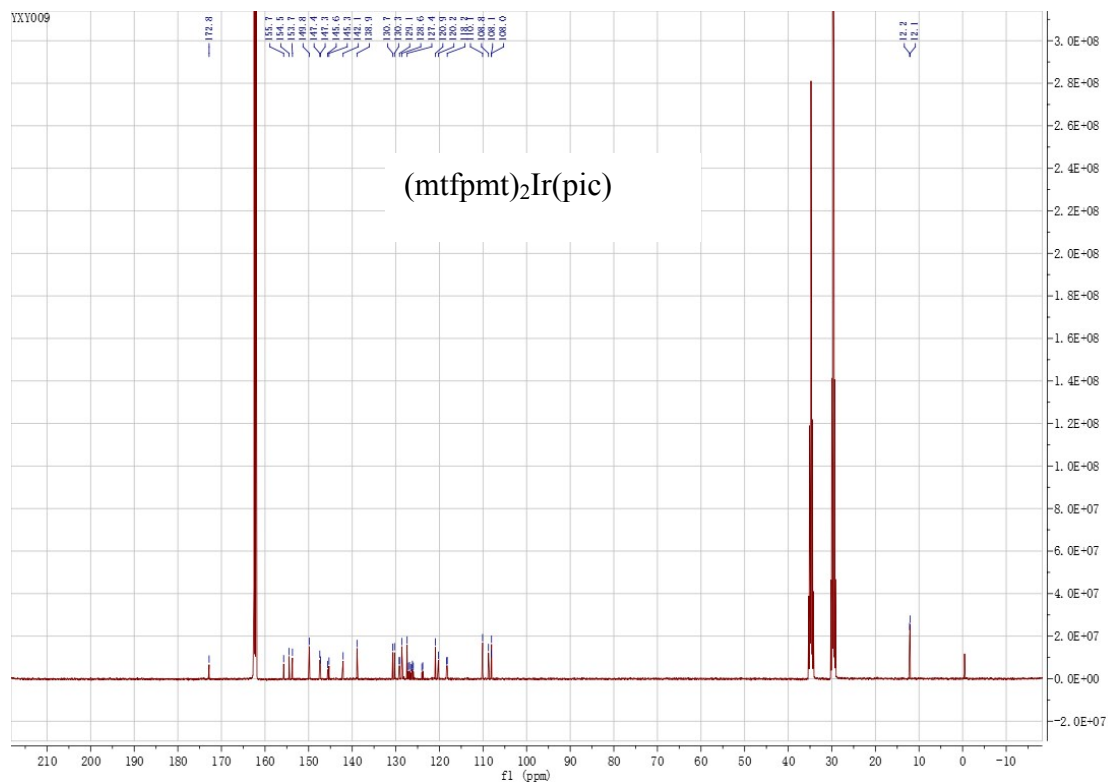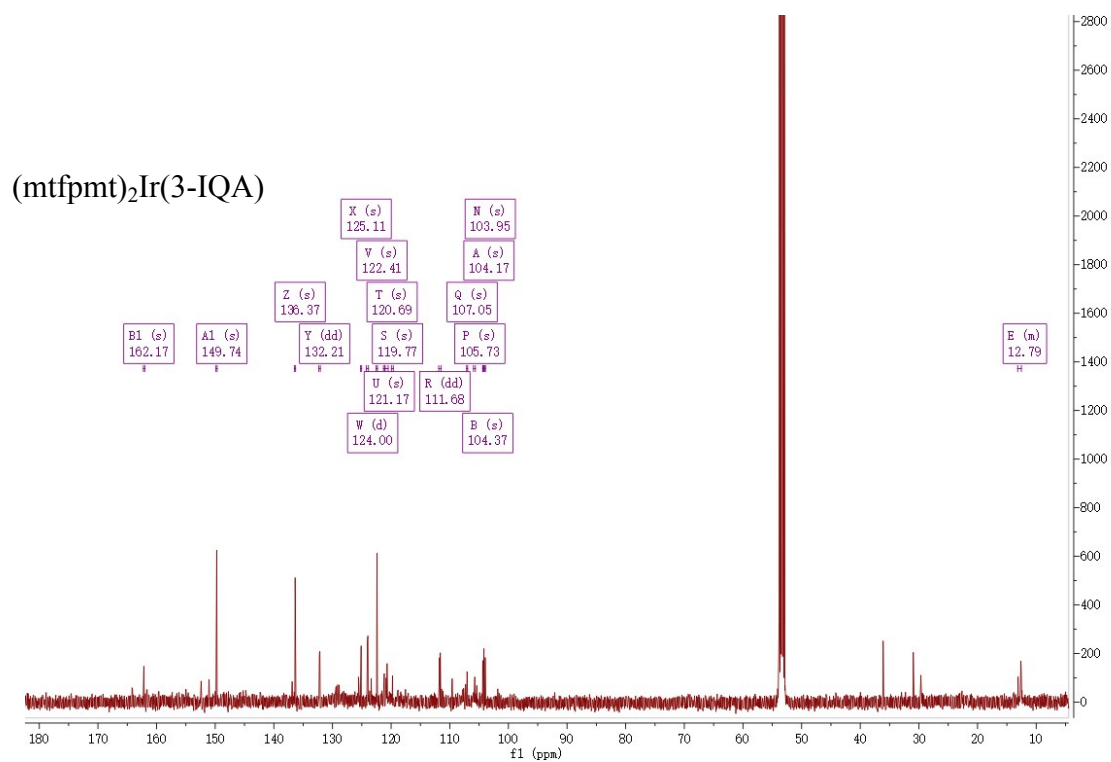

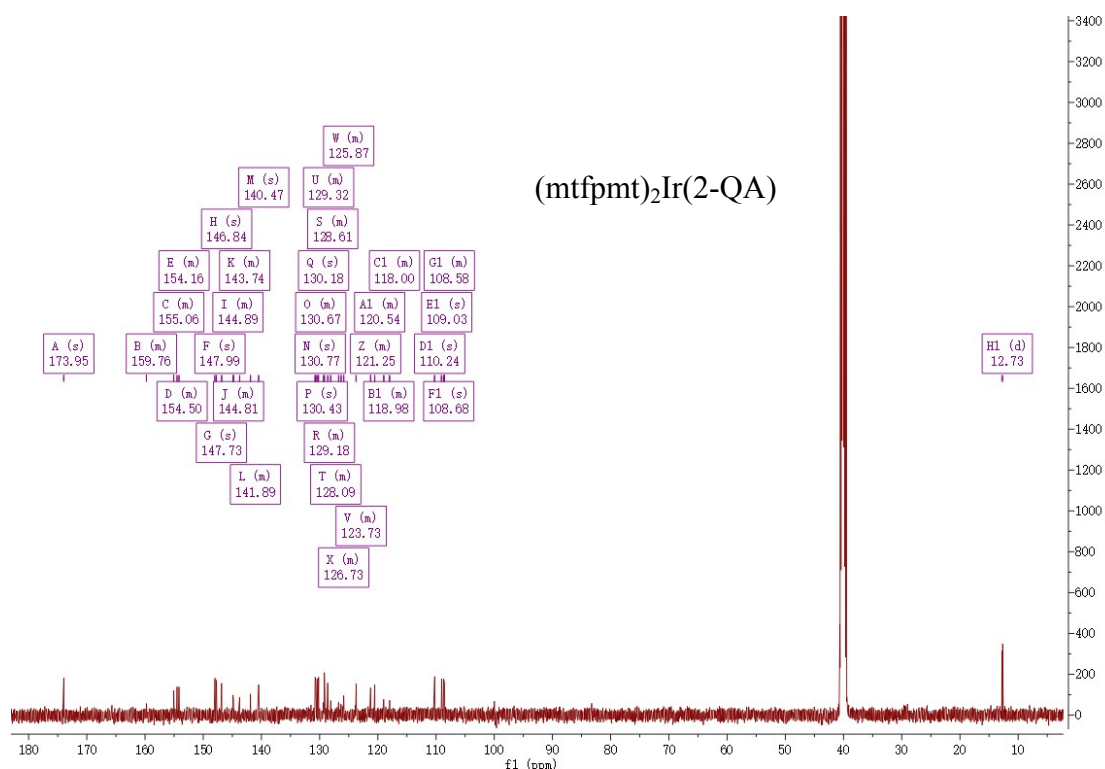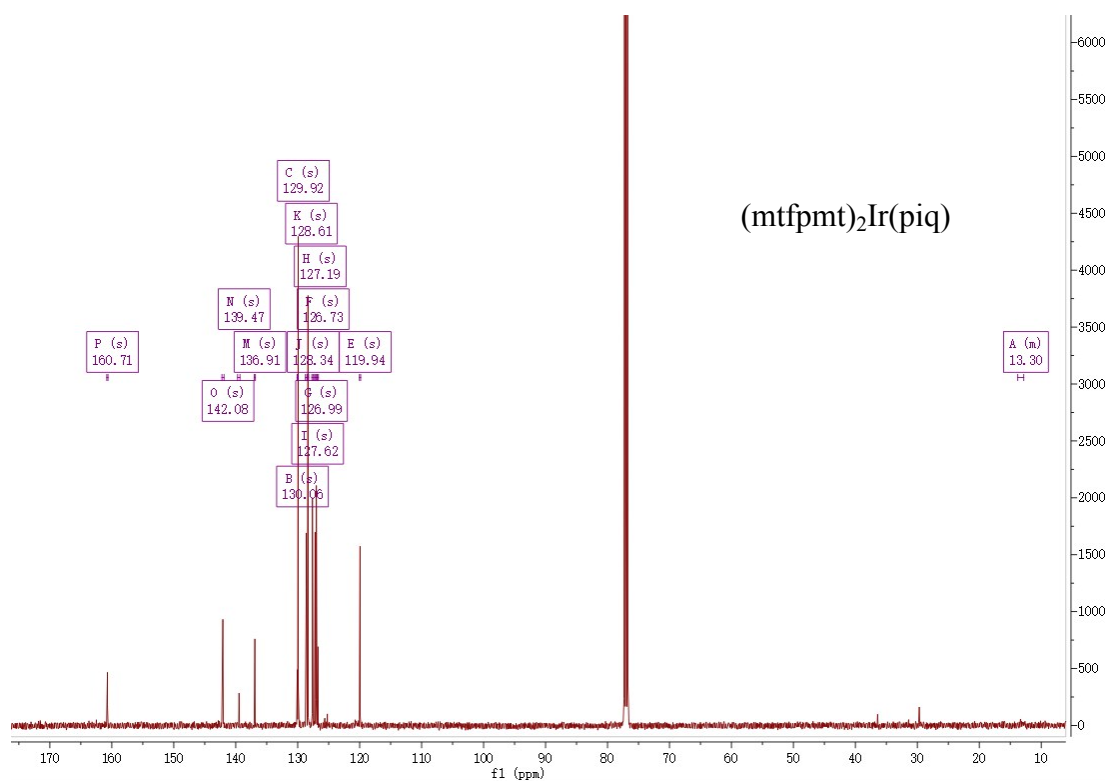

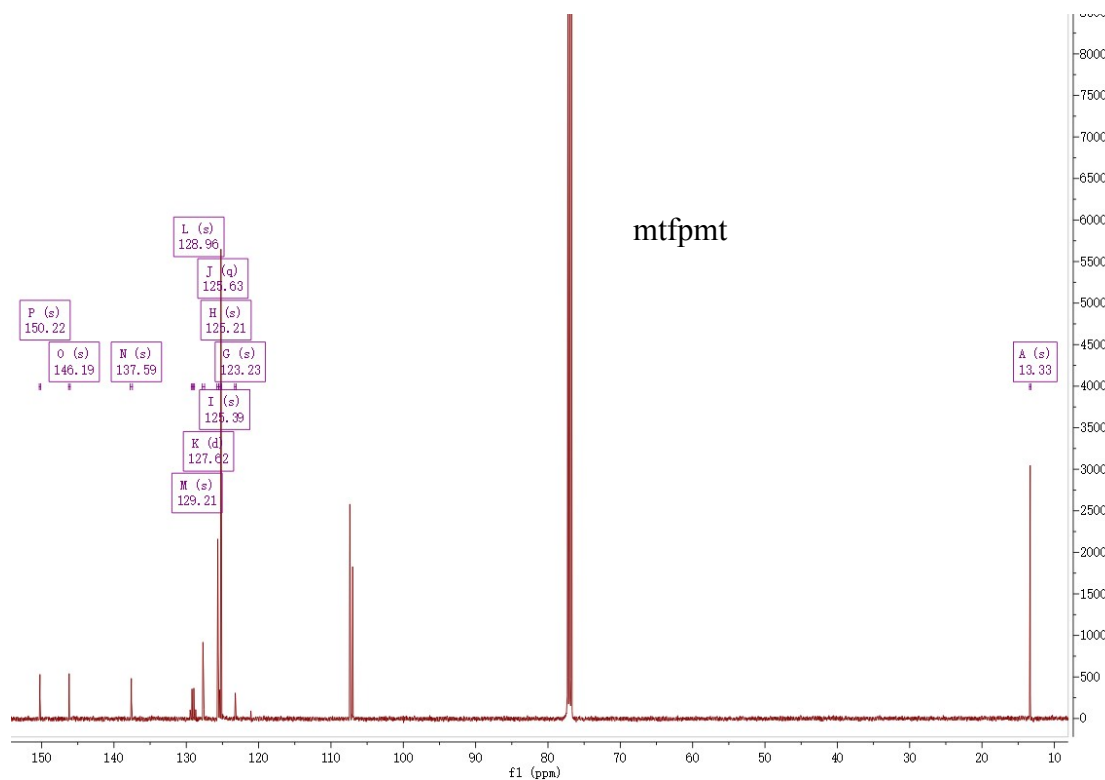

## IR spectra for the compounds mtfpmt:

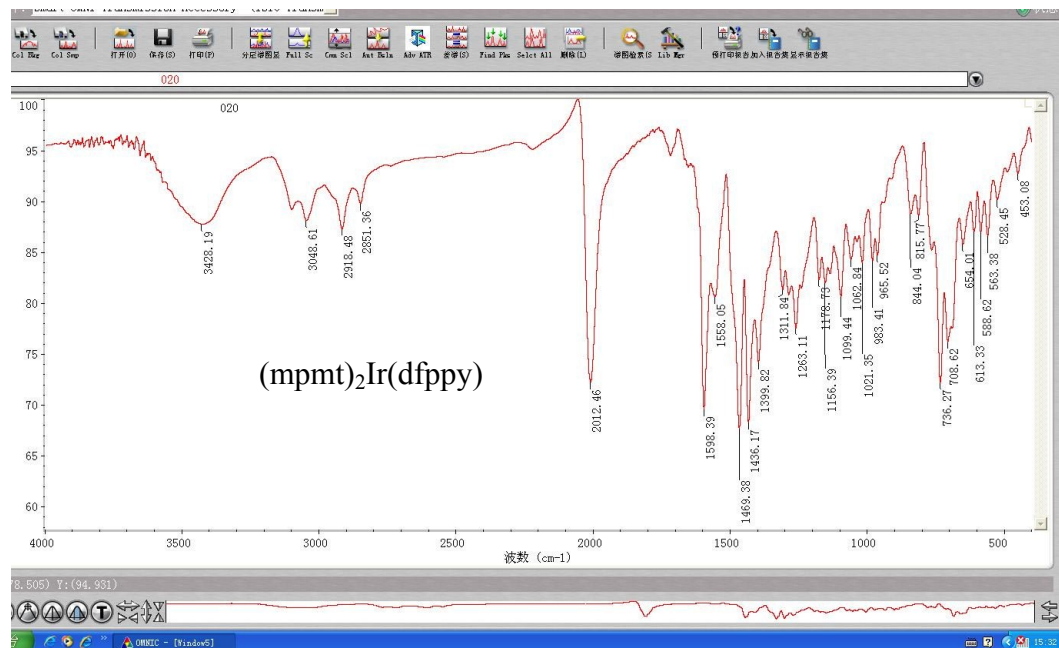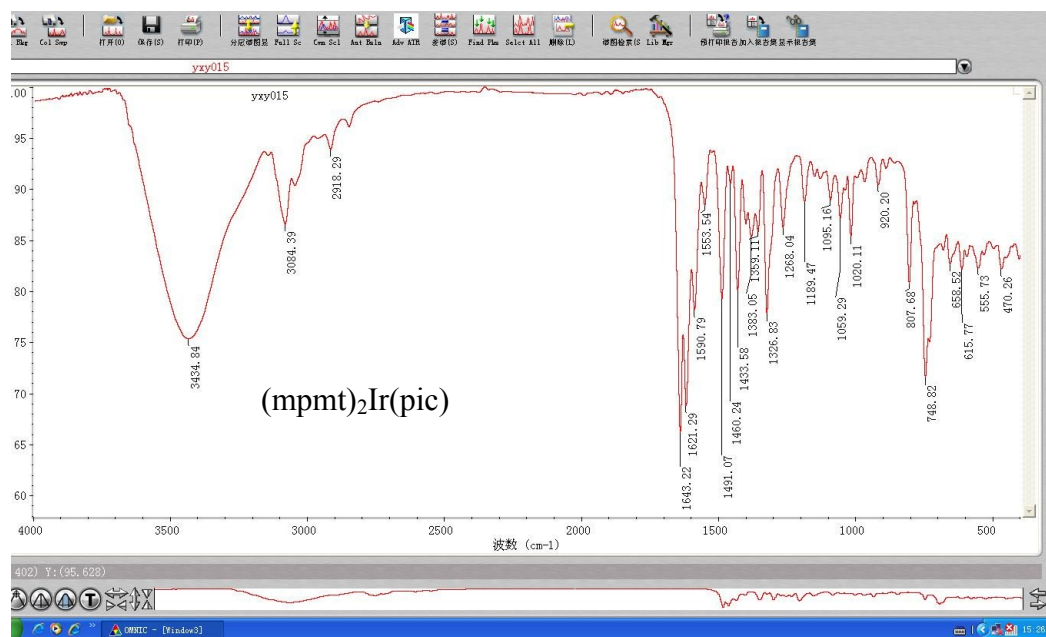

$(\text{mpmt})_2\text{Ir}(3\text{-IQA})$

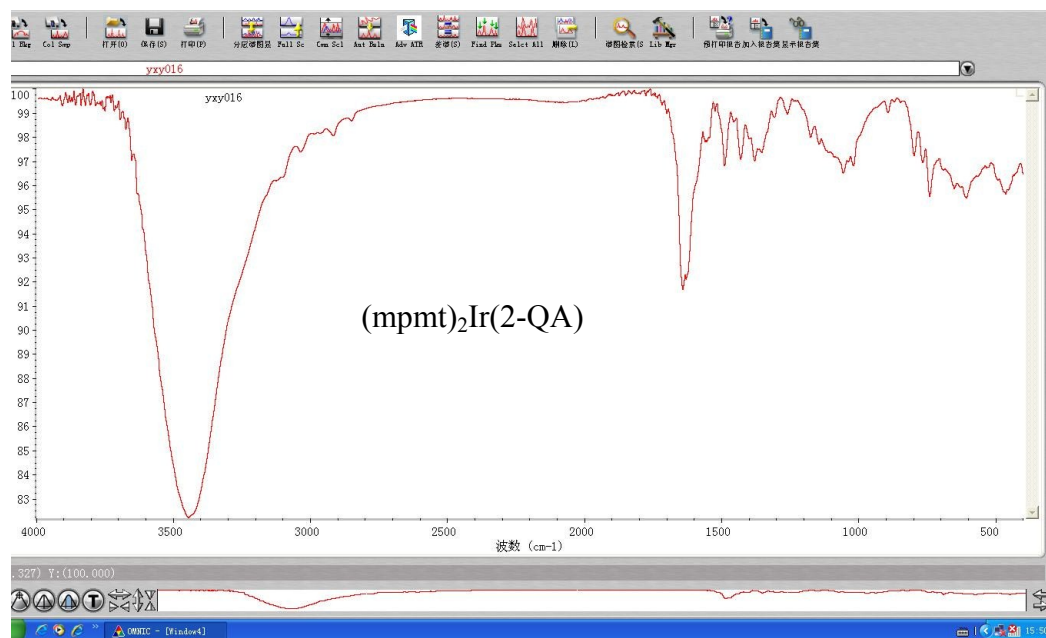

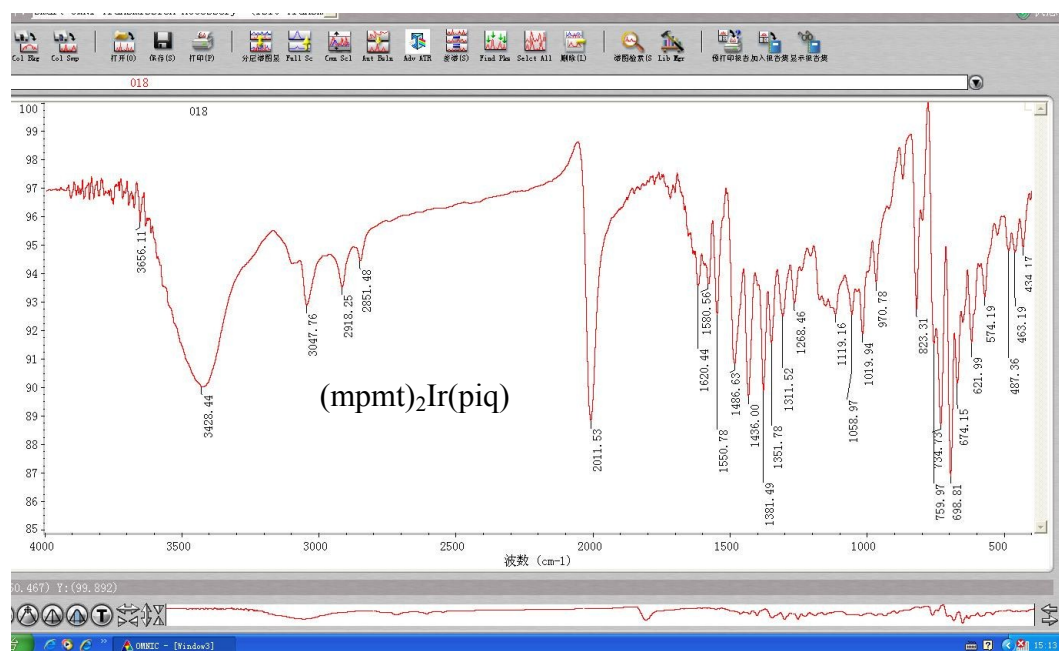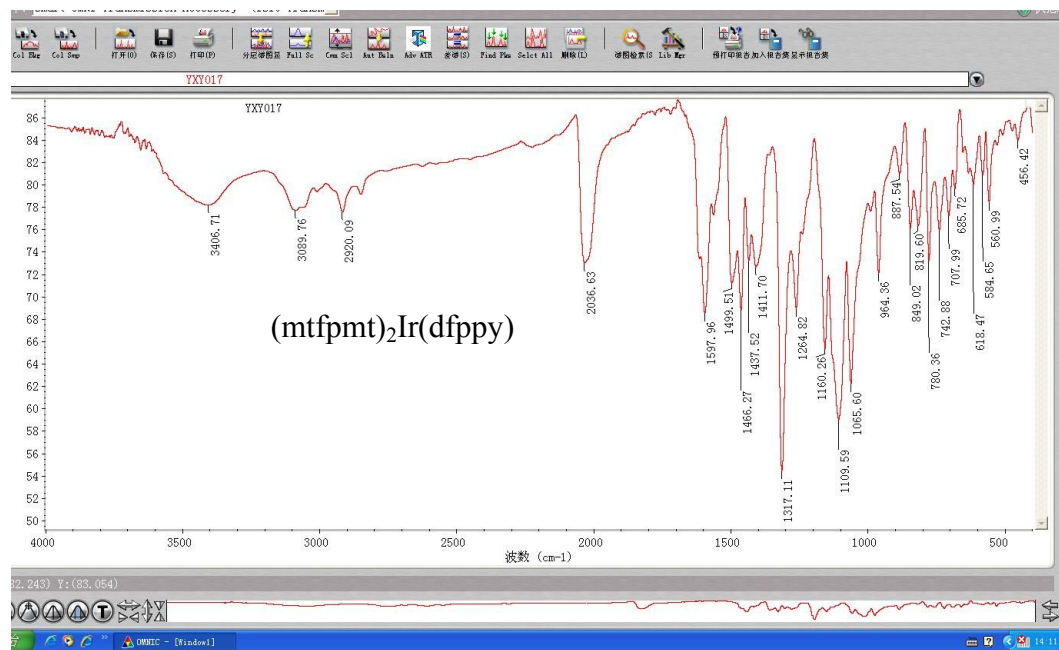



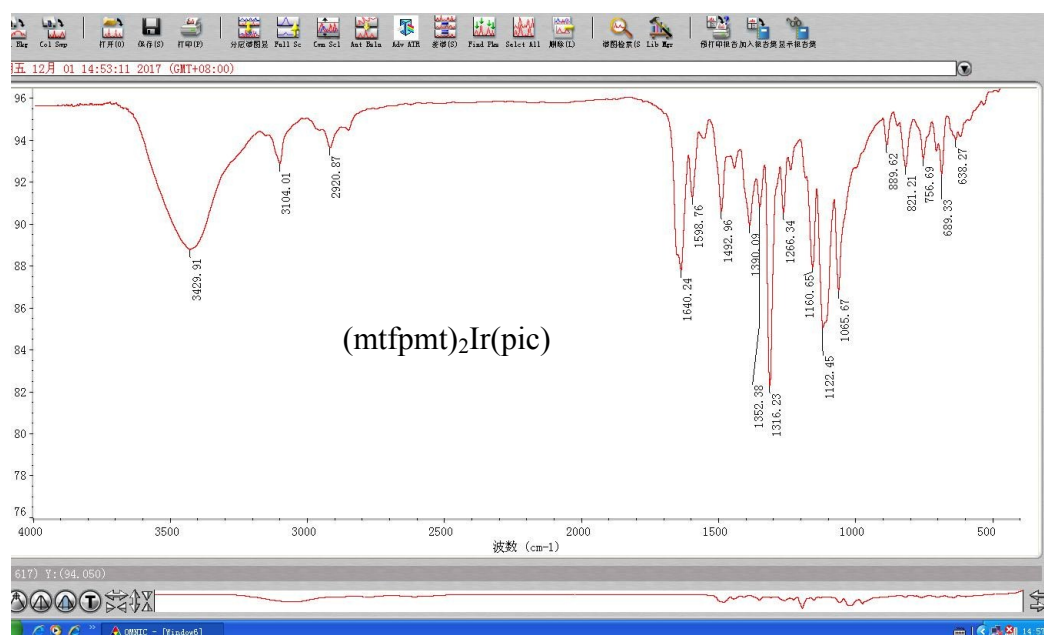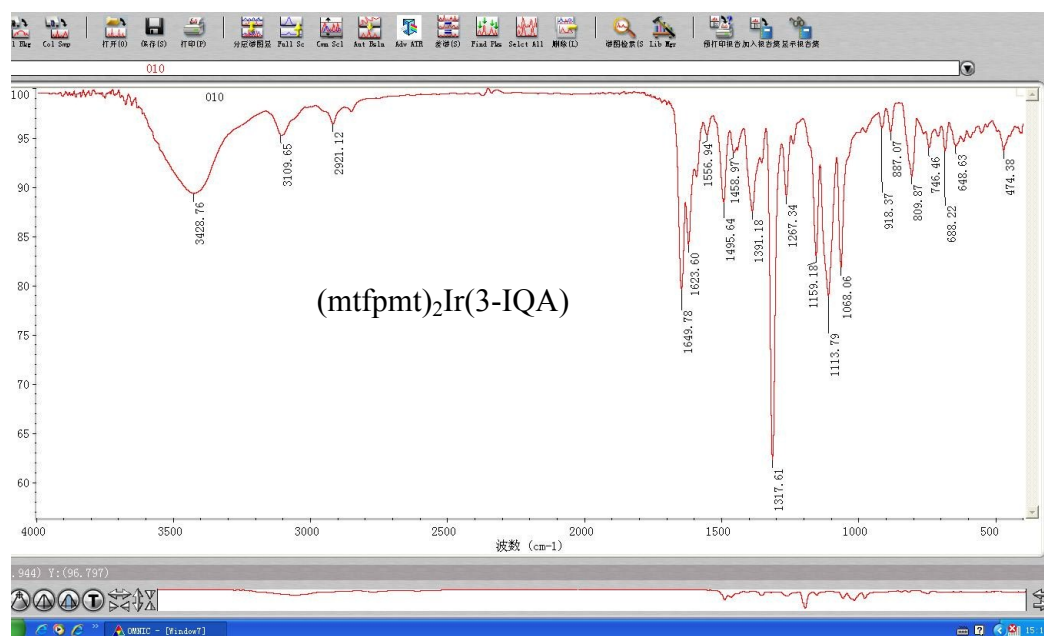

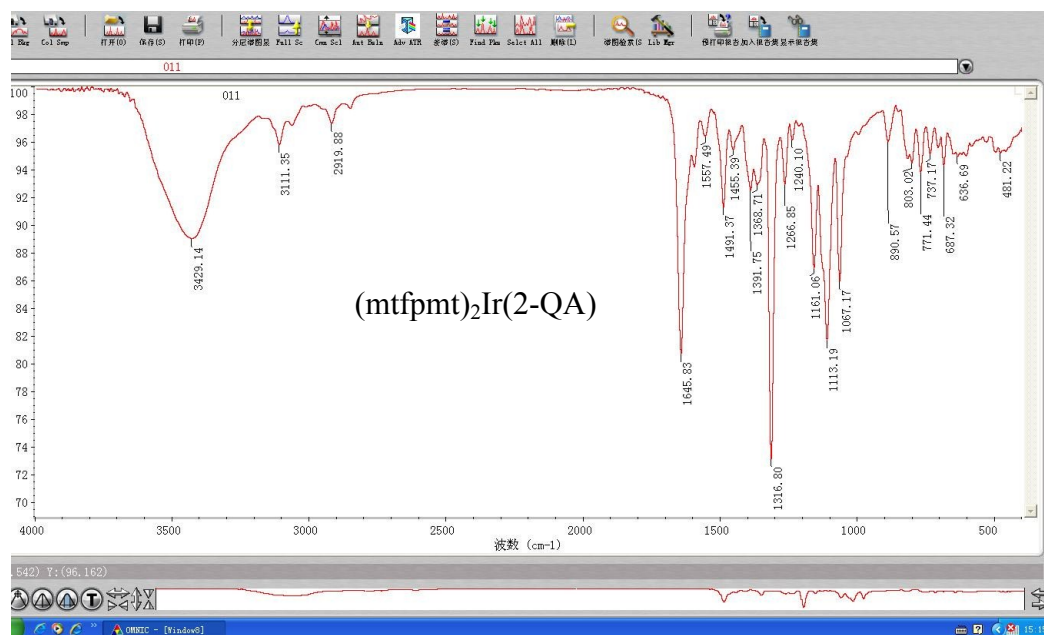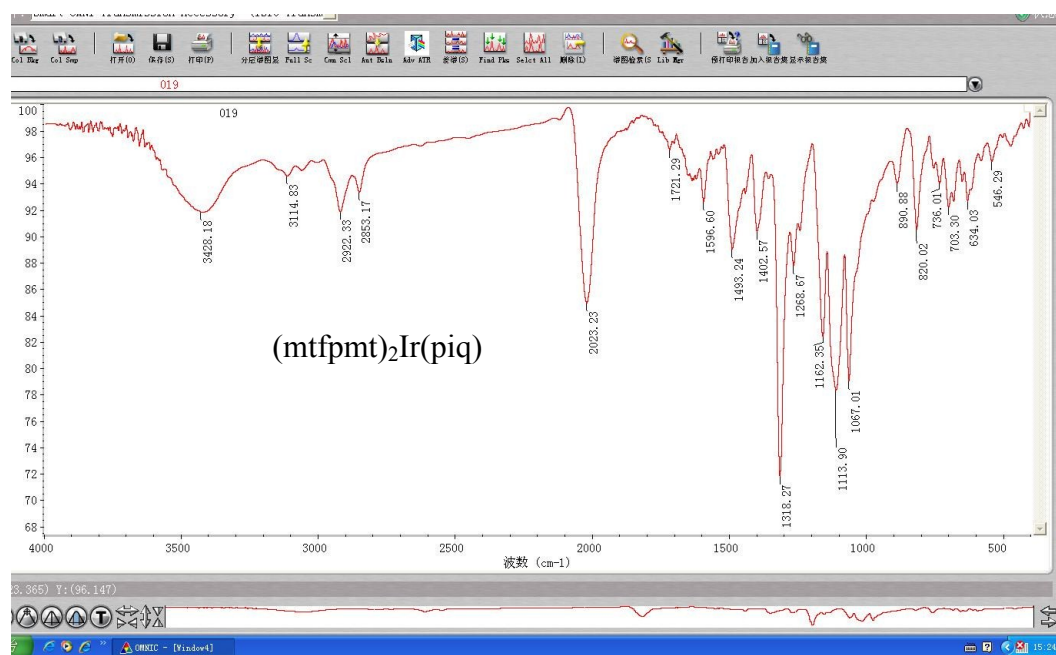

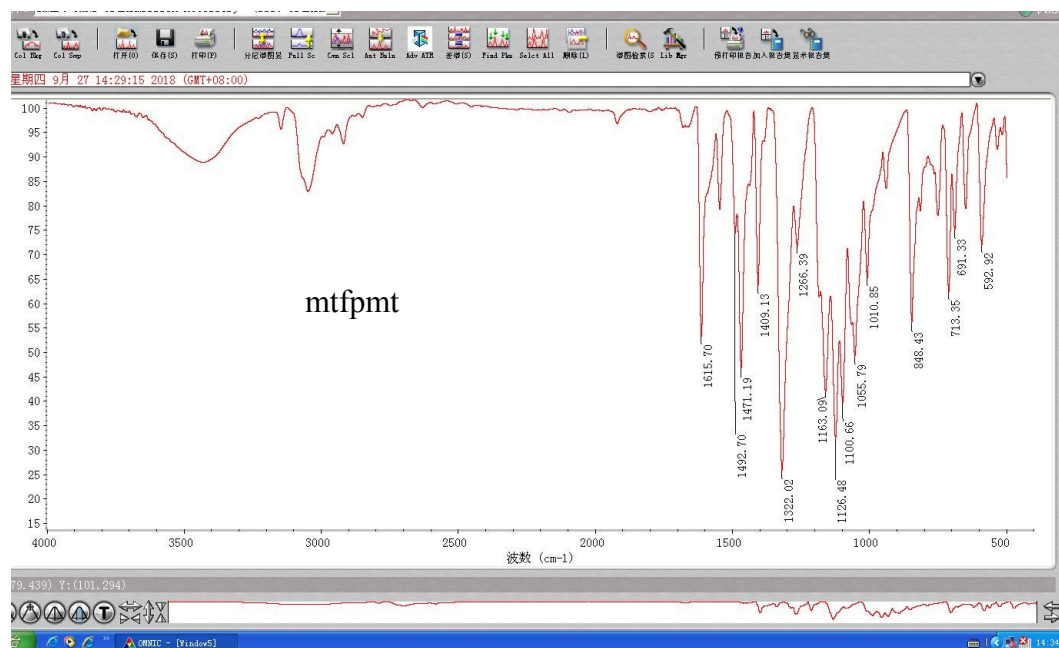

## ESI- HRMS spectra for the compounds :

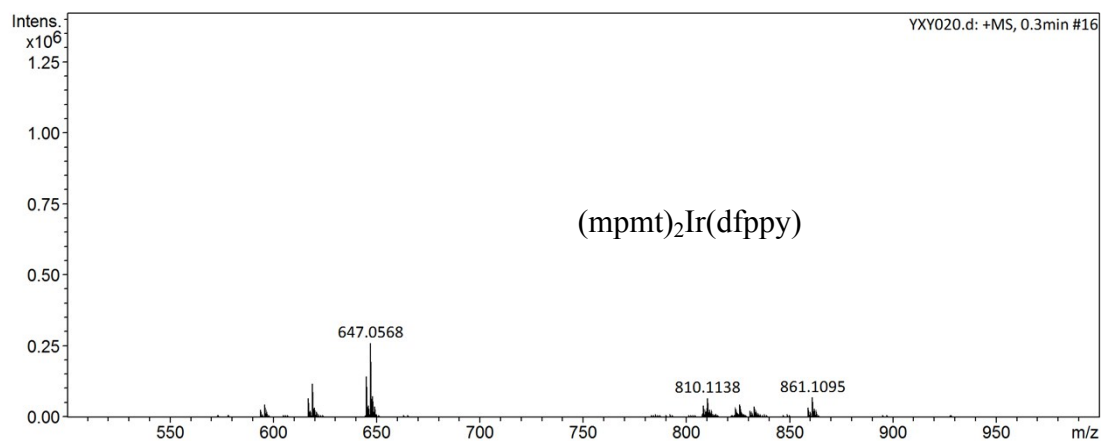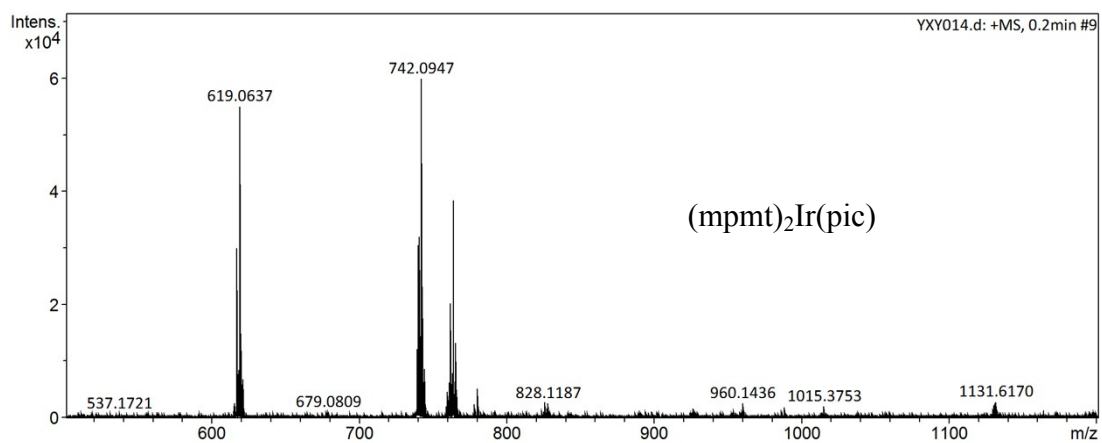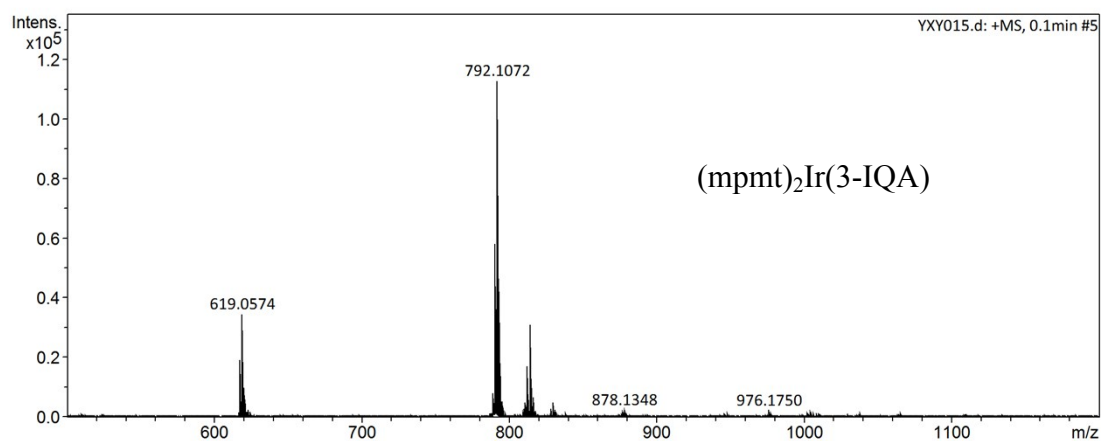

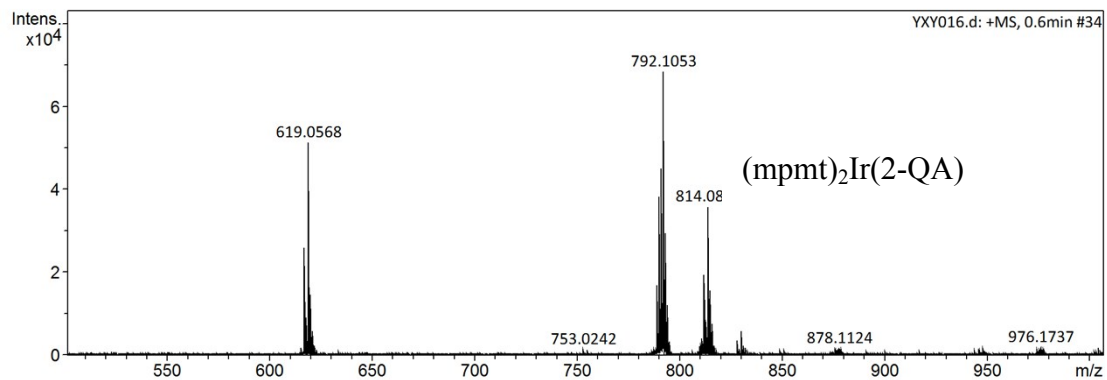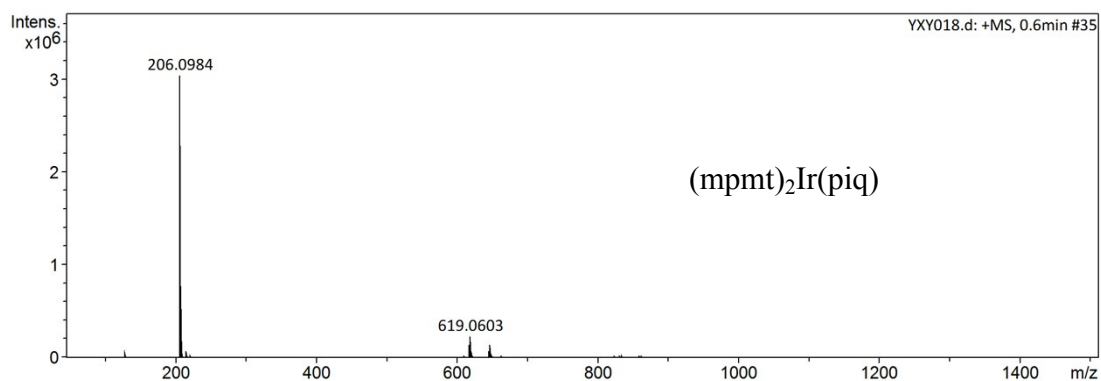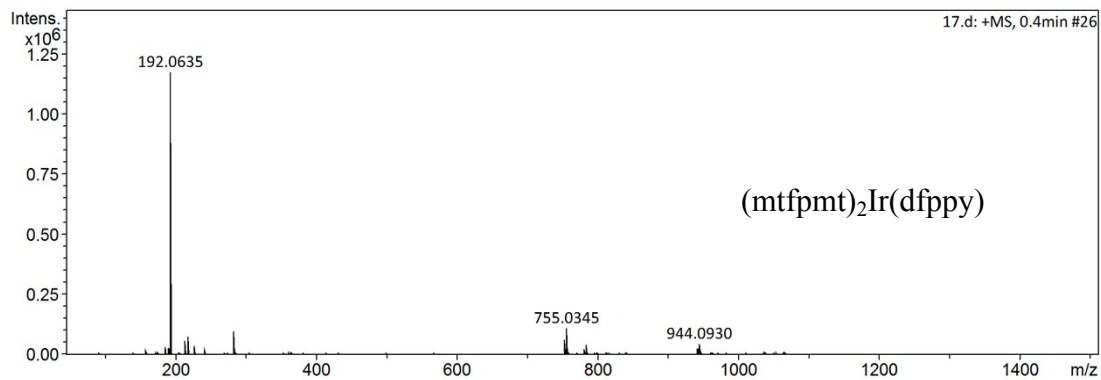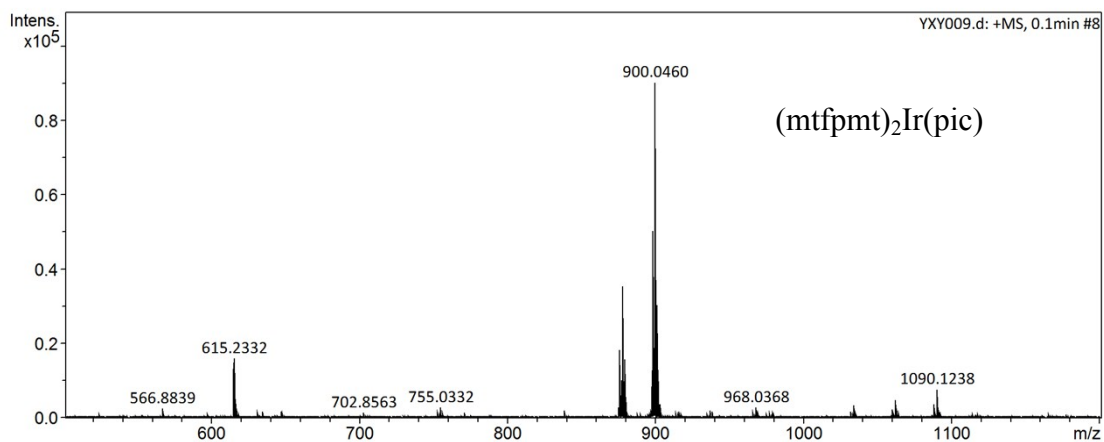

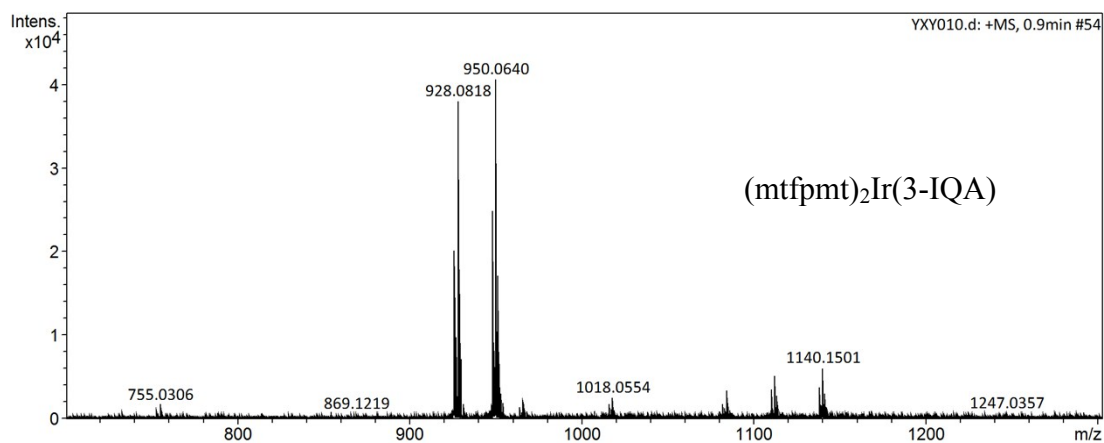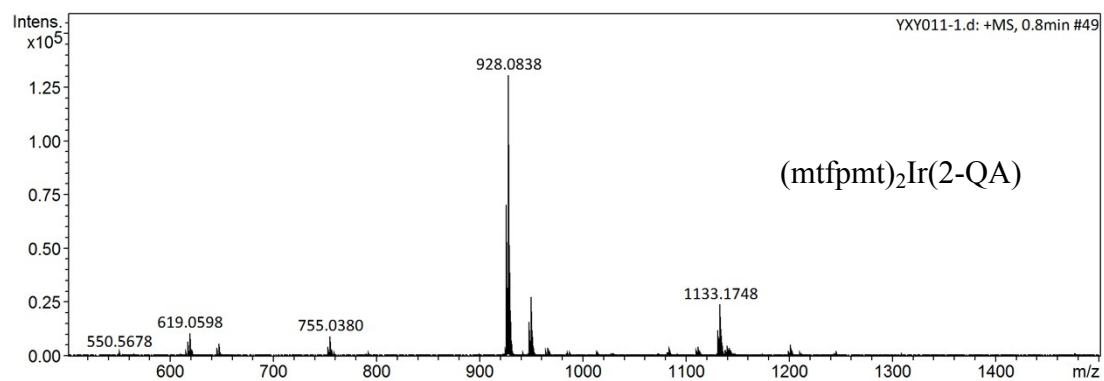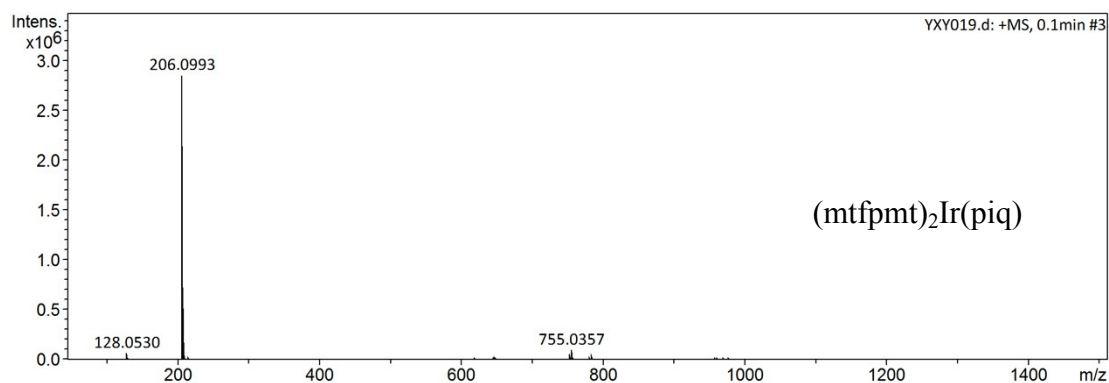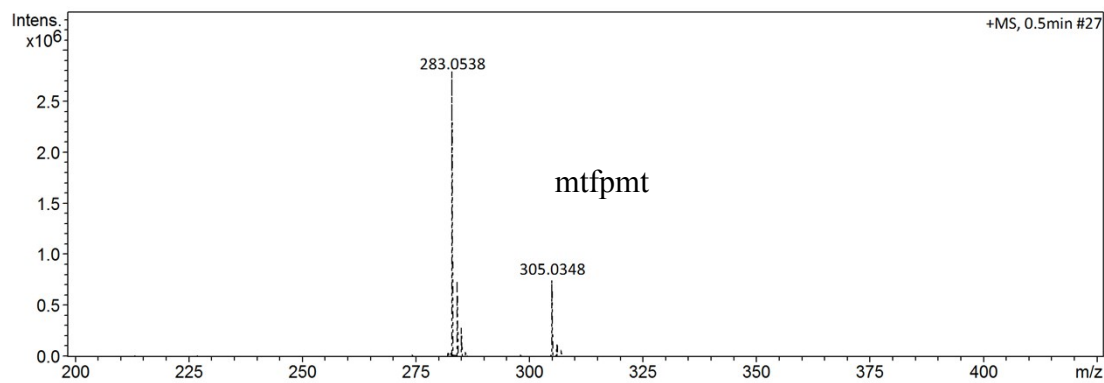

## CV data for the compounds:

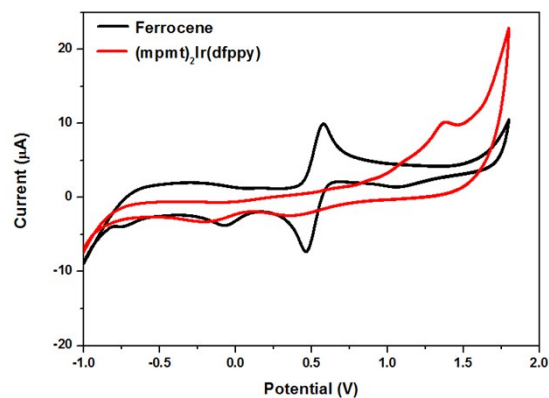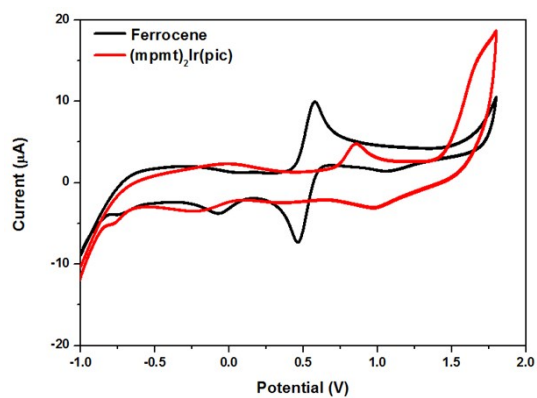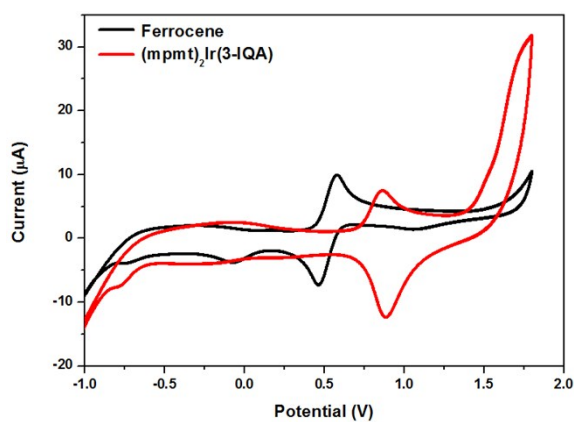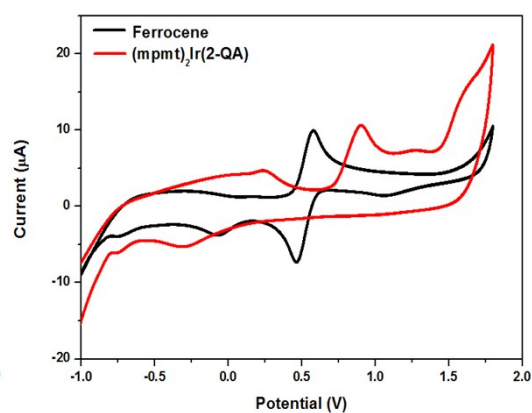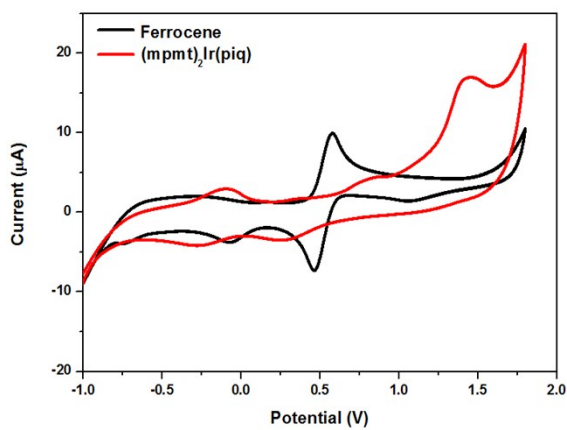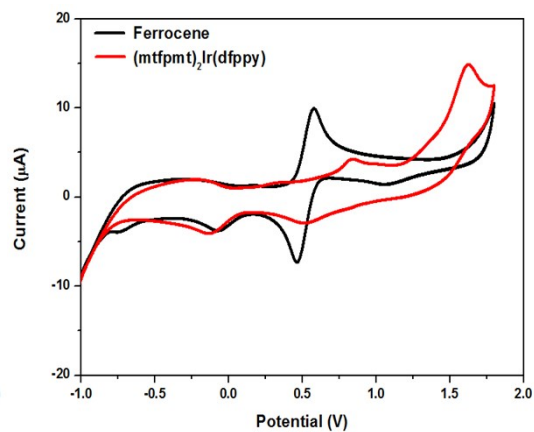

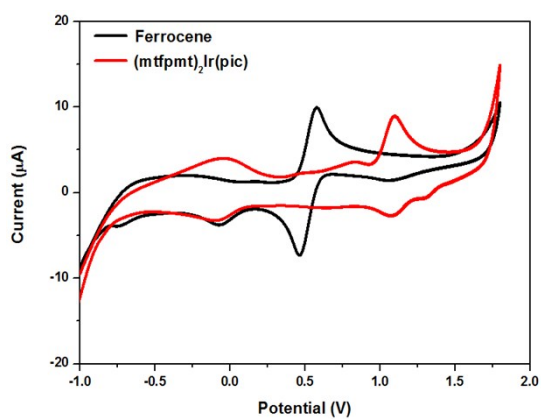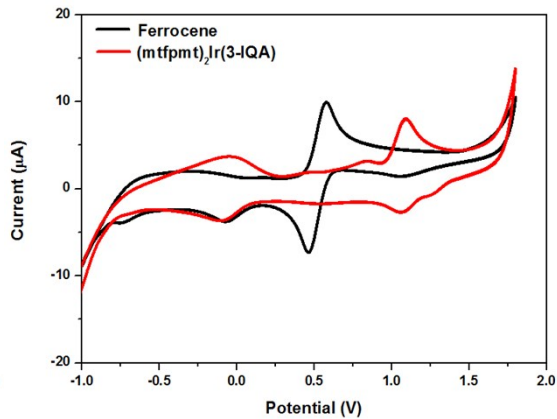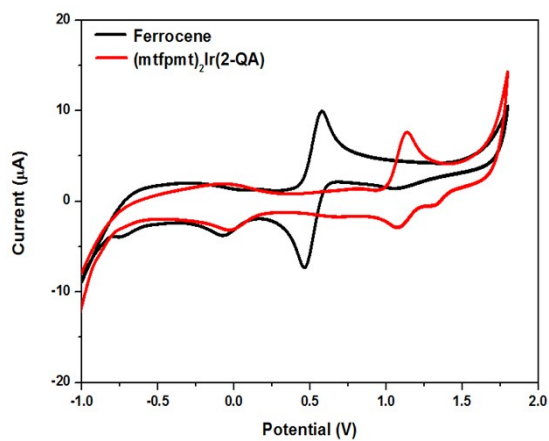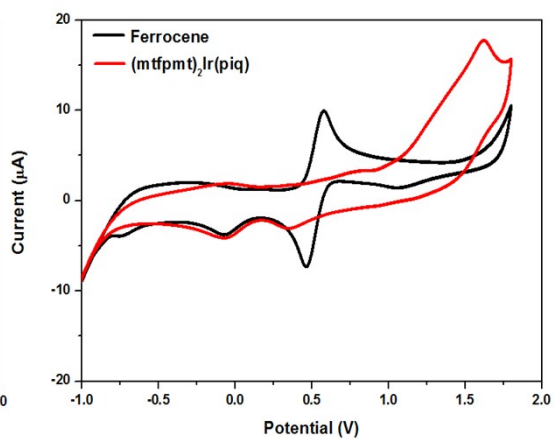

Supplement: c8nj06295a1.pdf [file c8nj06295a1.pdf]
